# Supplementary material for: Proficiency and Interlaboratory Variability in the Determination of Phthalate and DINCH Biomarkers in Human Urine: Results from the HBM4EU Project
Source: MDPI journal article supplement (doi:10.3390/toxics10020057), 2022-01-26
Supplement: s1 [file s1]

# Supplementary Materials: Proficiency and Interlaboratory Variability in the Determination of Phthalate and DINCH Biomarkers in Human Urine: Results from the HBM4EU Project

Hans G. J. Mol, Ingrid Elbers, Claudia Pälme, Daniel Bury, Thomas Göen, Marta Esteban López, Stefanie Nübler, Vincent Vaccher, Jean-Philippe Antignac, Darina Dvořáková, Jana Hajšlová, Amrit Kaur Sakhi, Cathrine Thomsen, Katrin Vorkamp, Argelia Castaño and Holger M. Koch

**Table S1.** Mean biomarkers concentration and overall RSD<sub>r</sub> (N = 20) as determined during homogeneity assessment.

| Biomarker | Round-1      |                  | Round-2      |                  |              |                  | Round-3      |                  |              |                  | Round-4      |                  |              |                  | Range tested |                  |        |         |
|-----------|--------------|------------------|--------------|------------------|--------------|------------------|--------------|------------------|--------------|------------------|--------------|------------------|--------------|------------------|--------------|------------------|--------|---------|
|           | material R1A |                  | material R1B |                  | material R2A |                  | material R2B |                  | material R3A |                  | material R3B |                  | material R4A |                  | material R4B |                  | lowest | highest |
|           | ng/mL        | RSD <sub>r</sub> | ng/mL  | ng/mL   |
| MEP       | 137          | 2%               | 138          | 1%               | 15.0         | 2%               | 40.2         | 2%               | 63.8         | 2%               | 100          | 4%               | 56.6         | 7%               | 137          | 2%               | 15.0   | 138     |
| MBzP      | 2.17         | 3%               | 3.6          | 4%               | 0.869        | 5%               | 9.37         | 3%               | < 0.2        | -                | 2.26         | 4%               | 1.74         | 9%               | 2.33         | 4%               | 0.87   | 9.37    |
| MiBP      | 7.94         | 2%               | 22.7         | 2%               | 9.00         | 2%               | 77.7         | 2%               | 1.03         | 12%*             | 14           | 6%               | 17           | 7%               | 17.5         | 2%               | 1.03   | 77.7    |
| MnBP      | 11           | 3%               | 16.4         | 3%               | 6.56         | 3%               | 53.6         | 2%               | 1.05         | 13%              | 10.3         | 6%               | 13           | 8%               | 10.4         | 2%               | 1.05   | 53.6    |
| MCHP      | < 0.2        | -                | 0.38         | 5%               | < 0.2        | -                | 0.98         | 5%               | < 0.2        | -                | 0.286        | 20%*             | 0.22         | 19%*             | 0.41         | 7%               | 0.220  | 0.980   |
| MnPeP     | < 0.2        | -                | 1.43         | 3%               | < 0.2        | -                | 8.54         | 3%               | < 0.2        | -                | 1.09         | 10%              | 1.54         | 8%               | 2.24         | 4%               | 1.09   | 8.54    |
| MEHP      | 1.58         | 8%               | 10.1         | 3%               | < 0.5        | -                | 5.39         | 3%               | 1.29         | 5%               | 4.82         | 4%               | 3.73         | 8%               | 4.47         | 2%               | 1.29   | 10.1    |
| 5OH-MEHP  | 10.7         | 2%               | 40.6         | 1%               | 4.28         | 1%               | 32.7         | 1%               | 2.74         | 5%               | 26.3         | 2%               | 11.9         | 7%               | 22.1         | 3%               | 2.74   | 40.6    |
| 5oxo-MEHP | 5.35         | 2%               | 19.7         | 2%               | 1.75         | 3%               | 14.8         | 2%               | 1.48         | 7%               | 13.5         | 3%               | 5.55         | 8%               | 11.1         | 4%               | 1.48   | 19.7    |
| 5cx-MEPP  | 8.56         | 2%               | 36.5         | 3%               | 4.90         | 2%               | 32.4         | 1%               | 2.78         | 3%               | 29.2         | 3%               | 13.2         | 7%               | 21.9         | 1%               | 2.78   | 36.5    |
| MnOP      | 1.18         | 3%               | 6.55         | 2%               | 0.215        | 5%               | 2.09         | 3%               | 0.296        | 7%               | 3.25         | 3%               | 1.24         | 7%               | 2.83         | 2%               | 0.215  | 6.55    |
| OH-MiNP   | 7.46         | 3%               | 17.5         | 3%               | 1.67         | 3%               | 9.11         | 3%               | 1.13         | 5%               | 11.6         | 3%               | 5.56         | 6%               | 8.55         | 3%               | 1.13   | 17.5    |
| cx-MiNP   | 7.35         | 3%               | 26.3         | 2%               | 1.67         | 6%               | 9.04         | 2%               | 1.6          | 6%               | 15.6         | 5%               | 7.29         | 7%               | 12.3         | 2%               | 1.60   | 26.3    |
| OH-MiDP   | 6.9          | 2%               | 32           | 3%               | 3.1          | 3%               | 18.7         | 3%               | 1.71         | 4%               | 18.2         | 4%               | 10.7         | 7%               | 18.0         | 3%               | 1.71   | 32.0    |
| cx-MiDP   | 5.28         | 3%               | 23.9         | 3%               | 1.68         | 3%               | 9.25         | 2%               | 1.92         | 6%               | 16           | 4%               | 7.96         | 6%               | 15.4         | 2%               | 1.68   | 23.9    |
| OH-MINCH  | 3.28         | 1%               | 19.1         | 2%               | 6.91         | 2%               | 22.96        | 1%               | 1.11         | 2%               | 13.5         | 2%               | 11.5         | 3%               | 8.65         | 4%               | 1.11   | 23.0    |
| cx-MINCH  | 3.16         | 3%               | 14.6         | 2%               | 3.53         | 2%               | 12.05        | 2%               | 1.17         | 2%               | 8.6          | 2%               | 7.51         | 4%               | 8.28         | 4%               | 1.17   | 14.6    |

\* within-sample standard deviation (s<sub>w</sub>) too high for adequate homogeneity assessment.

**Table S2.** Example sheets homogeneity assessment.

| Control material<br>A<br>MBzP          |                           |      | Control material<br>A<br>cx-MiNP |             | Control material<br>B<br>MCHP |             | Control material<br>B<br>MnPeP |             | Control material<br>B<br>MEHP |             |
|----------------------------------------|---------------------------|------|----------------------------------|-------------|-------------------------------|-------------|--------------------------------|-------------|-------------------------------|-------------|
| replicate-1                            | replicate-2               |      | replicate-1                      | replicate-2 | replicate-1                   | replicate-2 | replicate-1                    | replicate-2 | replicate-1                   | replicate-2 |
| 1                                      | 0.82                      | 0.89 | 1.92                             | 1.76        | 0.20                          | 0.35        | 1.18                           | 1.17        | 4.96                          | 4.78        |
| 2                                      | 0.89                      | 0.91 | 1.71                             | 1.78        | 0.31                          | 0.21        | 0.94                           | 1.03        | 4.87                          | 4.62        |
| 3                                      | 0.84                      | 0.91 | 1.84                             | 1.71        | 0.34                          | 0.29        | 1.22                           | 1.20        | 5.01                          | 4.90        |
| 4                                      | 0.80                      | 0.83 | 1.69                             | 1.70        | 0.37                          | 0.30        | 1.22                           | 0.89        | 5.16                          | 4.91        |
| 5                                      | 0.87                      | 0.88 | 1.64                             | 1.66        | 0.32                          | 0.34        | 1.09                           | 0.98        | 4.90                          | 4.79        |
| 6                                      | 0.94                      | 0.88 | 1.66                             | 1.72        | 0.31                          | 0.37        | 1.08                           | 1.11        | 4.65                          | 4.94        |
| 7                                      | 0.88                      | 0.91 | 1.64                             | 1.66        | 0.23                          | 0.23        | 1.25                           | 1.02        | 4.63                          | 4.82        |
| 8                                      | 0.92                      | 0.84 | 1.51                             | 1.66        | 0.25                          | 0.28        | 1.17                           | 0.96        | 4.93                          | 4.92        |
| 9                                      | 0.83                      | 0.80 | 1.46                             | 1.61        | 0.21                          | 0.31        | 1.09                           | 1.11        | 4.78                          | 4.43        |
| 10                                     | 0.86                      | 0.87 | 1.50                             | 1.65        | 0.20                          | 0.29        | 0.97                           | 1.10        | 4.85                          | 4.59        |
| grand mean                             | 0.870                     |      | 1.674                            |             | 0.286                         |             | 1.089                          |             | 4.822                         |             |
| Stdev                                  | 0.040                     |      | 0.108                            |             | 0.057                         |             | 0.105                          |             | 0.170                         |             |
| VC%                                    | 5%                        |      | 6%                               |             | 20%                           |             | 10%                            |             | 4%                            |             |
| Cochran's test                         |                           |      |                                  |             |                               |             |                                |             |                               |             |
| C                                      | 0.277                     |      | 0.214                            |             | 0.358                         |             | 0.445                          |             | 0.249                         |             |
| Ccrit                                  | 0.602                     |      | 0.602                            |             | 0.602                         |             | 0.602                          |             | 0.602                         |             |
| C < Ccrit →                            | No outliers de-<br>tected |      | No outliers de-<br>tected        |             | No outliers de-<br>tected     |             | No outliers de-<br>tected      |             | No outliers de-<br>tected     |             |
| target $\sigma_{FFP}$                  | 0.218                     |      | 0.419                            |             | 0.071                         |             | 0.272                          |             | 1.206                         |             |
| s <sub>x</sub> =                       | 0.0326                    |      | 0.0953                           |             | 0.0406                        |             | 0.0689                         |             | 0.1291                        |             |
| s <sub>w</sub> =                       | 0.0340                    |      | 0.0773                           |             | 0.0561                        |             | 0.1106                         |             | 0.1568                        |             |
| s <sub>s</sub> =                       | 0.0220                    |      | 0.0780                           |             | 0.0086                        |             | 0.0000                         |             | 0.0661                        |             |
| criti-<br>cal=0.3 $\sigma_{FFP}$       | 0.0651                    |      | 0.1256                           |             | 0.0214                        |             | 0.0817                         |             | 0.3617                        |             |
| s <sub>s</sub> < critical?             | Homogeneity<br>adequate   |      | Homogeneity<br>adequate          |             | Homogeneity<br>adequate       |             | Homogeneity<br>adequate        |             | Homogeneity<br>adequate       |             |
| s <sub>w</sub> < 0.5* $\sigma_{FFP}$ ? | Method suited             |      | Method suited                    |             | Method not<br>suited          |             | Method suited                  |             | Method suited                 |             |

Examples homogeneity assessment phthalate biomarkers from round-2 (left two) and round-3 (right three).

**Table S2.** (continued). Example sheets homogeneity assessment.

| Control material A<br>OH-MINCH           |                      |             | Control material A<br>cx-MINCH |             | Control material B<br>OH-MINCH |             | Control material B<br>cx-MINCH |             |
|------------------------------------------|----------------------|-------------|--------------------------------|-------------|--------------------------------|-------------|--------------------------------|-------------|
|                                          | replicate-1          | replicate-2 | replicate-1                    | replicate-2 | replicate-1                    | replicate-2 | replicate-1                    | replicate-2 |
| 1                                        | 6.64                 | 6.83        | 3.51                           | 3.57        | 23.34                          | 23.30       | 12.31                          | 12.46       |
| 2                                        | 6.91                 | 7.04        | 3.53                           | 3.62        | 23.25                          | 23.12       | 11.92                          | 12.43       |
| 3                                        | 6.83                 | 6.90        | 3.51                           | 3.63        | 23.05                          | 22.81       | 12.28                          | 12.20       |
| 4                                        | 6.71                 | 6.76        | 3.49                           | 3.38        | 23.00                          | 22.56       | 12.31                          | 12.10       |
| 5                                        | 6.79                 | 6.92        | 3.51                           | 3.51        | 23.00                          | 23.04       | 12.21                          | 11.95       |
| 6                                        | 6.91                 | 7.12        | 3.54                           | 3.57        | 22.26                          | 22.55       | 11.81                          | 12.06       |
| 7                                        | 6.94                 | 7.03        | 3.43                           | 3.56        | 23.47                          | 23.10       | 11.81                          | 12.16       |
| 8                                        | 7.03                 | 7.06        | 3.47                           | 3.63        | 22.31                          | 23.20       | 11.97                          | 11.65       |
| 9                                        | 6.95                 | 6.93        | 3.52                           | 3.46        | 22.70                          | 23.03       | 11.87                          | 11.72       |
| 10                                       | 6.87                 | 7.09        | 3.58                           | 3.53        | 23.17                          | 22.89       | 11.98                          | 11.76       |
| grand mean                               | 6.913                |             | 3.528                          |             | 22.958                         |             | 12.048                         |             |
| Stdev                                    | 0.128                |             | 0.064                          |             | 0.333                          |             | 0.241                          |             |
| VC%                                      | 2%                   |             | 2%                             |             | 1%                             |             | 2%                             |             |
| Cochran's test                           |                      |             |                                |             |                                |             |                                |             |
| C                                        | 0.270                |             | 0.292                          |             | 0.538                          |             | 0.343                          |             |
| Ccrit                                    | 0.602                |             | 0.602                          |             | 0.602                          |             | 0.602                          |             |
| C < Ccrit →                              | No outliers detected |             | No outliers detected           |             | No outliers detected           |             | No outliers detected           |             |
| target <sub>OFFP</sub>                   | 1.728                |             | 0.882                          |             | 5.739                          |             | 3.012                          |             |
| s <sub>x</sub> =                         | 0.1111               |             | 0.0442                         |             | 0.2762                         |             | 0.2004                         |             |
| s <sub>w</sub> =                         | 0.0947               |             | 0.0662                         |             | 0.2713                         |             | 0.1948                         |             |
| s <sub>s</sub> =                         | 0.0887               |             | 0.0000                         |             | 0.1988                         |             | 0.1455                         |             |
| critical=0.30 <sub>OFFP</sub>            | 0.5185               |             | 0.2646                         |             | 1.7218                         |             | 0.9036                         |             |
| s <sub>s</sub> < critical?               | Homogeneity adequate |             | Homogeneity adequate           |             | Homogeneity adequate           |             | Homogeneity adequate           |             |
| s <sub>w</sub> < 0.5*s <sub>OFFP</sub> ? | Method suited        |             | Method suited                  |             | Method suited                  |             | Method suited                  |             |

Examples homogeneity assessment DINCH biomarkers from round-2.

**Table S3.** Expert values used as assigned values in performance assessment rounds 2–4.

| Biomarker | Concentrations (mean of means) as derived from Expert Labs |   |           |       |           |       |           |   |           |        |           |       |       |   |       |        |   |       |
|-----------|------------------------------------------------------------|---|-----------|-------|-----------|-------|-----------|---|-----------|--------|-----------|-------|-------|---|-------|--------|---|-------|
|           | Urine R2A                                                  |   | Urine R2B |       | Urine R3A |       | Urine R3B |   | Urine R4A |        | Urine R4B |       |       |   |       |        |   |       |
|           | ng/mL                                                      | N | u         | ng/mL | N         | u     | ng/mL     | N | u         | ng/mL  | N         | u     | ng/mL | N | u     | ng/mL  | N | u     |
| MEP       | 17.39                                                      | 5 | 5.1%      | 52.28 | 5         | 6.4%  | 71.77     | 5 | 3.5%      | 103.41 | 5         | 4.0%  | 51.48 | 4 | 3.5%  | 121.60 | 4 | 4.3%  |
| MBzP      | 0.95                                                       | 5 | 7.9%      | 10.36 | 5         | 4.8%  | < 0.2     |   |           | 3.21   | 5         | 13.6% | 2.03  | 4 | 6.6%  | 2.81   | 4 | 7.3%  |
| MiBP      | 8.59                                                       | 4 | 4.9%      | 69.88 | 4         | 7.1%  | 1.28      | 5 | 5.6%      | 15.32  | 5         | 2.9%  | 17.43 | 4 | 3.7%  | 17.22  | 4 | 3.5%  |
| MnBP      | 6.64                                                       | 5 | 4.7%      | 53.86 | 5         | 3.2%  | 1.03      | 5 | 7.6%      | 11.76  | 5         | 3.5%  | 13.95 | 4 | 2.2%  | 11.04  | 4 | 2.2%  |
| MCHP      | < 0.20                                                     | 3 |           | 1.26  | 3         | 11.5% | < 0.2     |   |           | 0.45   | 3         | 23.4% | 0.29  | 3 | 16.8% | 0.53   | 3 | 12.5% |
| MnPeP     | 0.89                                                       | 2 |           | 12.25 | 3         | 21.0% | < 0.2     |   |           | 1.32   | 4         | 9.4%  | 1.75  | 3 | 6.6%  | 2.50   | 3 | 5.6%  |
| MEHP      | 0.57                                                       | 3 | 9.6%      | 5.89  | 6         | 2.4%  | 1.21      | 5 | 16.5%     | 4.76   | 5         | 2.8%  | 3.33  | 4 | 4.4%  | 3.98   | 4 | 4.9%  |
| 5OH-MEHP  | 4.12                                                       | 6 | 4.6%      | 32.29 | 6         | 4.3%  | 3.01      | 5 | 3.4%      | 27.10  | 5         | 3.1%  | 13.21 | 4 | 3.5%  | 23.23  | 4 | 2.0%  |
| 5oxo-MEHP | 1.74                                                       | 6 | 6.2%      | 14.56 | 6         | 6.3%  | 1.44      | 5 | 1.5%      | 12.86  | 5         | 2.2%  | 5.82  | 4 | 1.9%  | 11.10  | 4 | 1.9%  |
| 5cx-MEPP  | 5.41                                                       | 6 | 3.6%      | 33.05 | 6         | 4.2%  | 3.22      | 5 | 5.9%      | 28.36  | 5         | 4.1%  | 15.64 | 4 | 7.0%  | 24.69  | 4 | 5.4%  |
| MnOP      | 0.13                                                       | 2 |           | 1.70  | 3         | 1.9%  | 0.36      | 3 | 25.4%     | 2.94   | 3         | 6.1%  | 1.36  | 4 | 16.4% | 2.57   | 4 | 5.7%  |
| OH-MiNP*  | 1.81                                                       | 3 | 14.6%     | 11.19 | 3         | 15.3% | 1.07      | 3 | 6.4%      | 8.83   | 3         | 36.8% | 5.80  | 3 | 6.9%  | 8.17   | 3 | 2.4%  |
| cx-MiNP*  | 2.64                                                       | 4 | 13.8%     | 12.61 | 4         | 11.4% | 2.04      | 5 | 7.9%      | 19.19  | 5         | 5.3%  | 9.25  | 4 | 8.4%  | 15.73  | 4 | 9.3%  |
| OH-MiDP*  | 2.88                                                       | 3 | 14.1%     | 17.17 | 3         | 11.2% | 1.55      | 3 | 16.5%     | 19.13  | 3         | 3.7%  | 9.87  | 3 | 4.5%  | 15.93  | 3 | 6.5%  |
| cx-MiDP*  | 1.95                                                       | 3 | 12.3%     | 9.99  | 3         | 9.5%  | 1.80      | 5 | 7.6%      | 14.63  | 5         | 6.6%  | 7.19  | 4 | 3.8%  | 13.49  | 4 | 5.3%  |
| OH-MINCH* | 6.91                                                       | 3 | 1.3%      | 22.95 | 3         | 0.9%  | 1.09      | 3 | 8.6%      | 12.99  | 3         | 2.0%  | 12.32 | 3 | 3.9%  | 9.71   | 3 | 5.8%  |
| cx-MINCH* | 3.66                                                       | 3 | 2.3%      | 12.05 | 3         | 0.1%  | 1.09      | 3 | 3.4%      | 8.30   | 3         | 6.2%  | 7.07  | 3 | 10.6% | 7.70   | 3 | 9.9%  |

*N* = number of expert-laboratories means used for determination of the expert values. *u* = relative uncertainty of the expert value (RSD divided by the square root of the number of expert laboratories).

\* prescribed quantifier *m/z* transitions used: OH-MiNP 307 > 121; cx-MiNP 321 > 173; OH-MiDP 321 > 121; cx-MiDP 335 > 187; OH-MINCH 313 > 153; cx-MINCH 327 > 173

Values with grey background: expert value not suited and not used as assigned value because less than three expert laboratories involved or too high variability in expert laboratory results.

**Table S4.** List of expert laboratories in phthalate and DINCH biomarker QA/QC program.

| COUNTRY       | LABORATORY GROUP                                                                                 | INSTITUTION                                  |
|---------------|--------------------------------------------------------------------------------------------------|----------------------------------------------|
| Denmark (1,2) | Chemical Laboratory at Dep. of Growth and Reproduction                                           | Rigshospitalet, Region Hovedstaden (RegionH) |
| Germany (1,2) | Institute for Prevention and Occupational Medicine of the German Social Accident Insurance (IPA) | Ruhr-Universität Bochum                      |
| Sweden (1*)   | Occupational and environmental medicine                                                          | Lund University                              |
| USA (1)       | Arizona Department of Health Services Laboratory                                                 |                                              |
| USA (1,2)     | Centers for Disease Control and Prevention (CDC)                                                 |                                              |
| USA (1**)     | New York State Department of Health, Wadsworth Center                                            |                                              |

(1) Laboratory contributing as expert laboratory phthalate biomarkers (\*R2 only, \*\*R2&R3 only). (2) Laboratory contributing as expert laboratory DINCH biomarkers.

**Table S5.** Effect enzyme used for deconjugation on results of selected biomarkers.

| Sample | Biomarker | N  | <i>E.coli</i> based enzyme |       |     | N | <i>H. Pomatia</i> based enzyme |       |     | Difference<br>HP vs EC | t-test             |
|--------|-----------|----|----------------------------|-------|-----|---|--------------------------------|-------|-----|------------------------|--------------------|
|        |           |    | mean                       | SD    | RSD |   | mean                           | SD    | RSD |                        |                    |
| R2A    | MEP       | 12 | 19.21                      | 4.98  | 26% | 3 | 23.24                          | 6.33  | 27% | 21%                    | not significant    |
| R2A    | MBzP      | 10 | 1.01                       | 0.25  | 25% | 3 | 1.26                           | 0.42  | 34% | 24%                    | not significant    |
| R2A    | MiBP      | 8  | 8.07                       | 0.86  | 11% | 3 | 10.93                          | 0.80  | 7%  | 35%                    | <b>Significant</b> |
| R2A    | MnBP      | 12 | 6.40                       | 2.06  | 32% | 3 | 9.50                           | 0.87  | 9%  | 49%                    | <b>Significant</b> |
| R2A    | MEHP      | 7  | 0.65                       | 0.15  | 23% | 4 | 1.43                           | 0.37  | 26% | 120%                   | <b>Significant</b> |
| R2A    | 5OH-MEHP  | 11 | 4.06                       | 0.48  | 12% | 6 | 4.15                           | 1.31  | 32% | 2%                     | not significant    |
| R2A    | 5oxo-MEHP | 11 | 1.68                       | 0.24  | 15% | 5 | 2.00                           | 0.75  | 37% | 19%                    | not significant    |
| R2B    | MEP       | 12 | 62.22                      | 17.51 | 28% | 3 | 61.20                          | 8.83  | 14% | −2%                    | not significant    |
| R2B    | MBzP      | 11 | 10.50                      | 2.22  | 21% | 4 | 8.45                           | 3.33  | 39% | −19%                   | not significant    |
| R2B    | MiBP      | 8  | 69.42                      | 27.10 | 39% | 4 | 63.09                          | 13.73 | 22% | −9%                    | not significant    |
| R2B    | MnBP      | 12 | 54.38                      | 12.46 | 23% | 4 | 45.74                          | 14.96 | 33% | −16%                   | not significant    |
| R2B    | MEHP      | 12 | 6.30                       | 1.09  | 17% | 5 | 6.45                           | 1.37  | 21% | 2%                     | not significant    |
| R2B    | 5OH-MEHP  | 10 | 31.20                      | 4.63  | 15% | 6 | 25.63                          | 8.15  | 32% | −18%                   | not significant    |
| R2B    | 5oxo-MEHP | 11 | 13.68                      | 1.96  | 14% | 6 | 11.90                          | 3.62  | 30% | −13%                   | not significant    |

Data from control materials from round-2. Mean and SD are in ng/mL. Results were only used when the corresponding isotope analogue of the biomarker was used for quantification and when the number of results for both enzyme groups was at least three. Three example Box Whisker plots are shown in Figure S1.

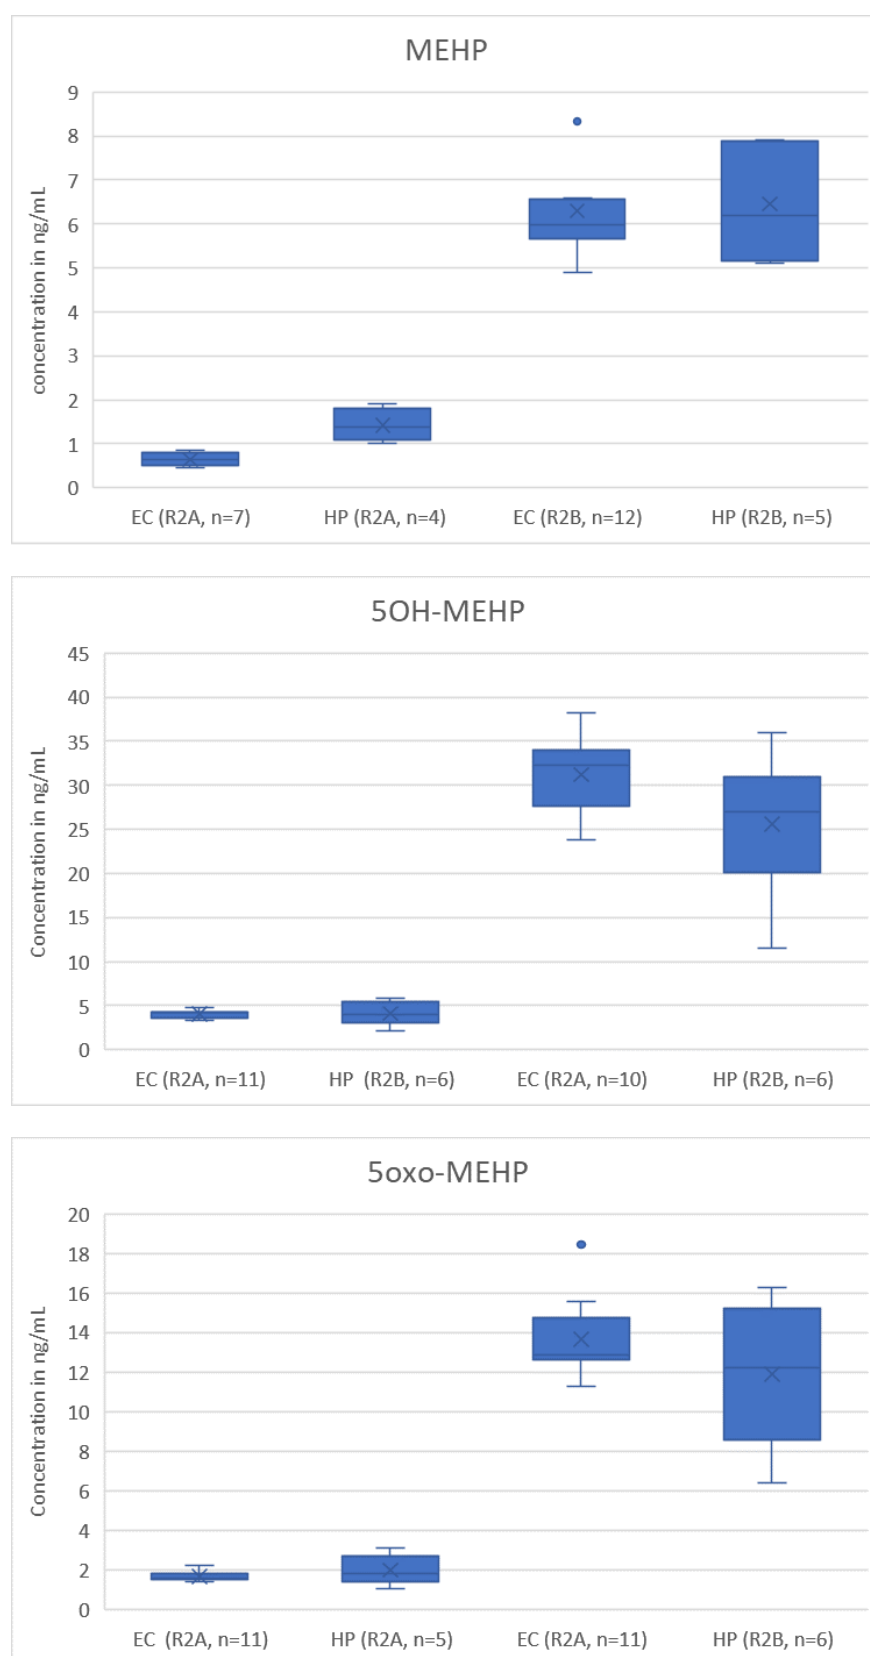

**Figure S1.** Effect enzyme used for deconjugation on results of selected biomarkers. Box-Whisker plots for results obtained for three example biomarkers in two control materials from round-2 (R2A and R2B) where either *E.coli* (EC) or *H. Pomatia* (HP) enzymes were used for deconjugation. Between brackets the number of results used. Other details see Table S5.

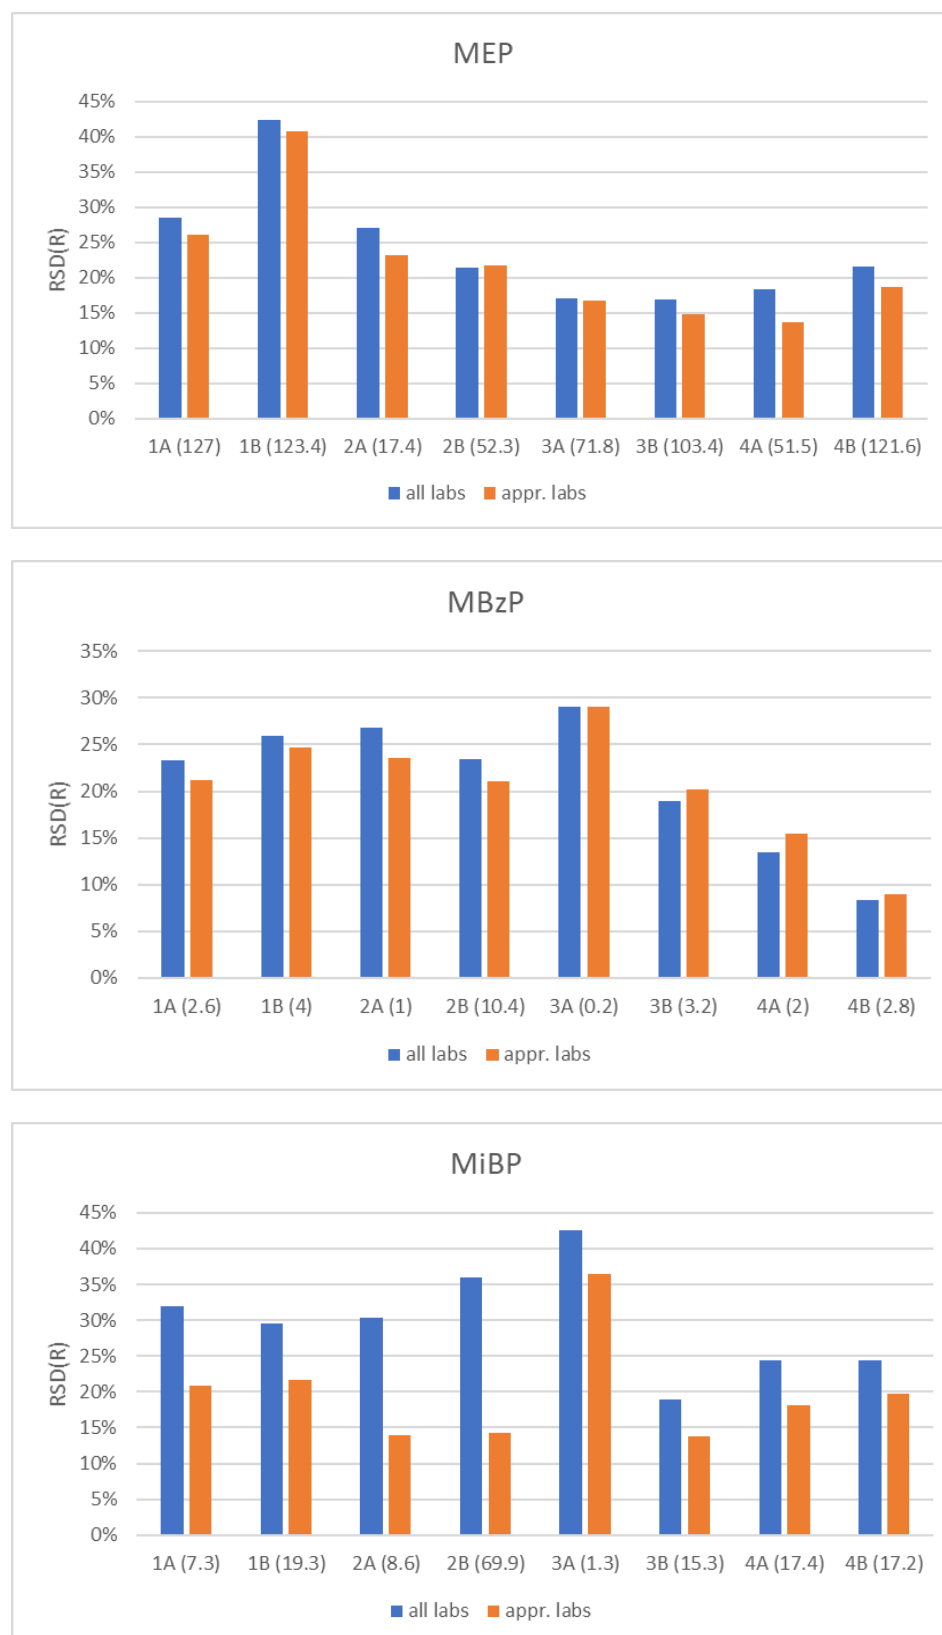

**Figure S2.** Interlaboratory variability of determination of phthalate and DINCH biomarkers in urine. RSD(R) = relative standard deviation, interlaboratory reproducibility. Legend X-axis: round/material number, between brackets the concentration of the biomarker in ng/mL. All labs = laboratories participating in the PT excluding the expert laboratories. Appr. labs = EU laboratories (participants and EU-based expert laboratories) approved for sample analysis within the frame of HBM4EU.

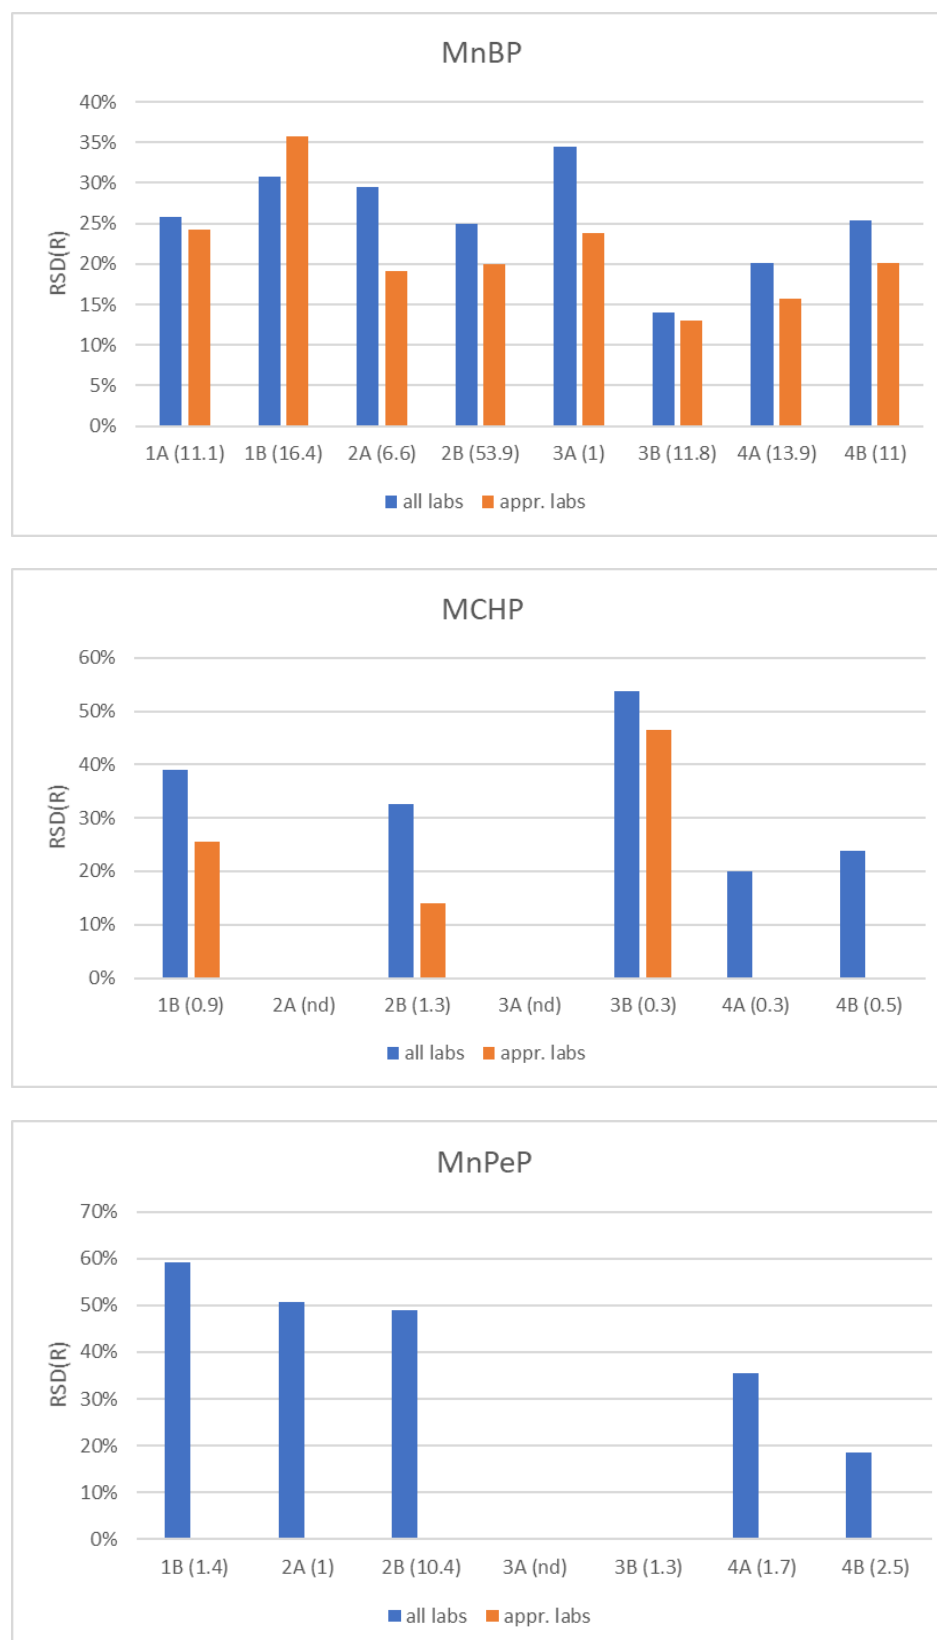

**Figure S2.** Interlaboratory variability of determination of phthalate and DINCH biomarkers in urine (continued). nd = not determined (biomarker not present). Appr. labs: RSD(R) not calculated because  $N < 7$ .



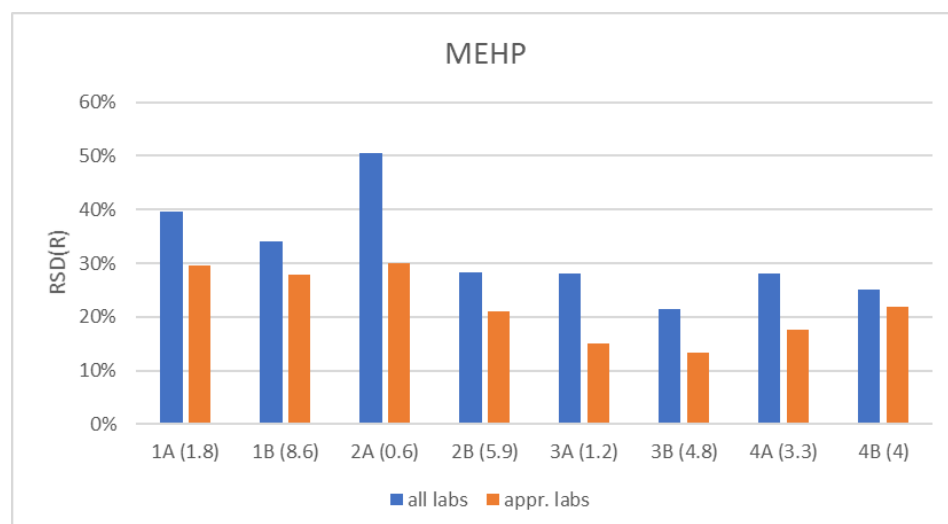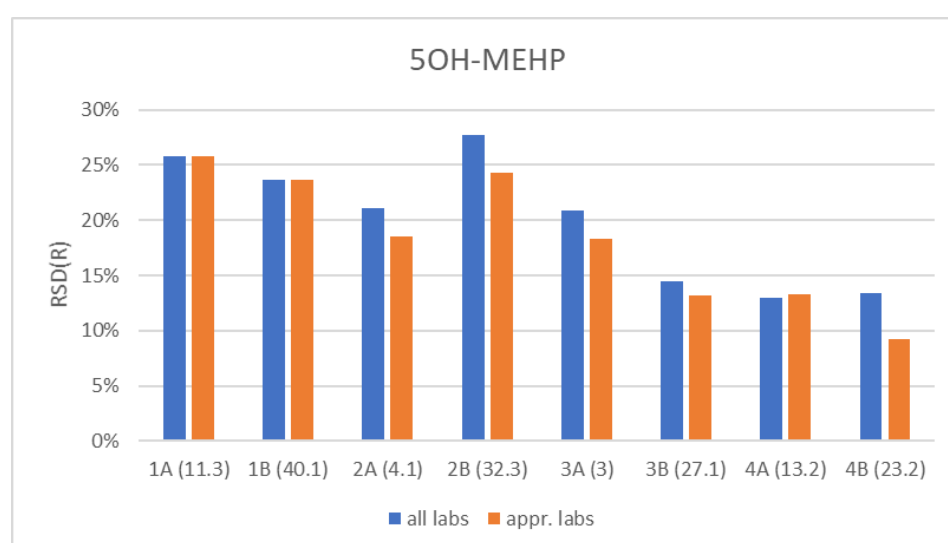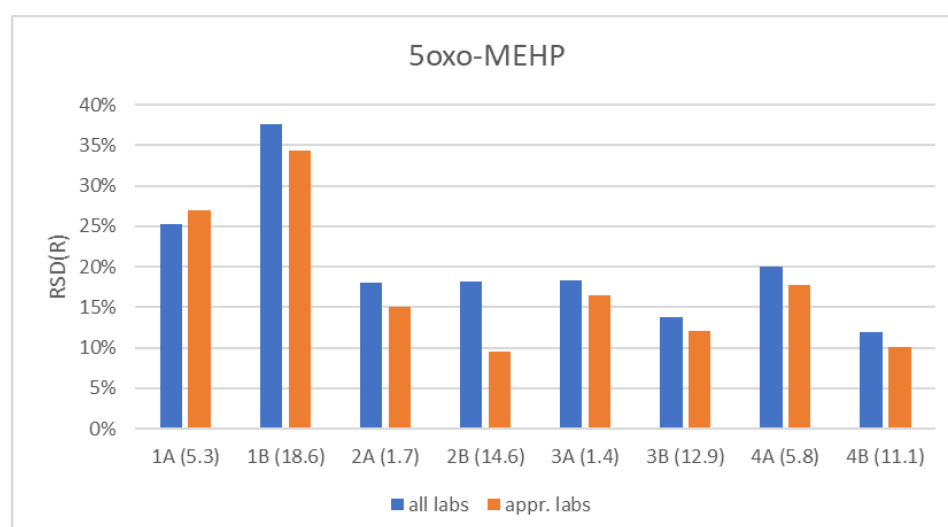

**Figure S2.** Interlaboratory variability of determination of phthalate and DINCH biomarkers in urine (continued).

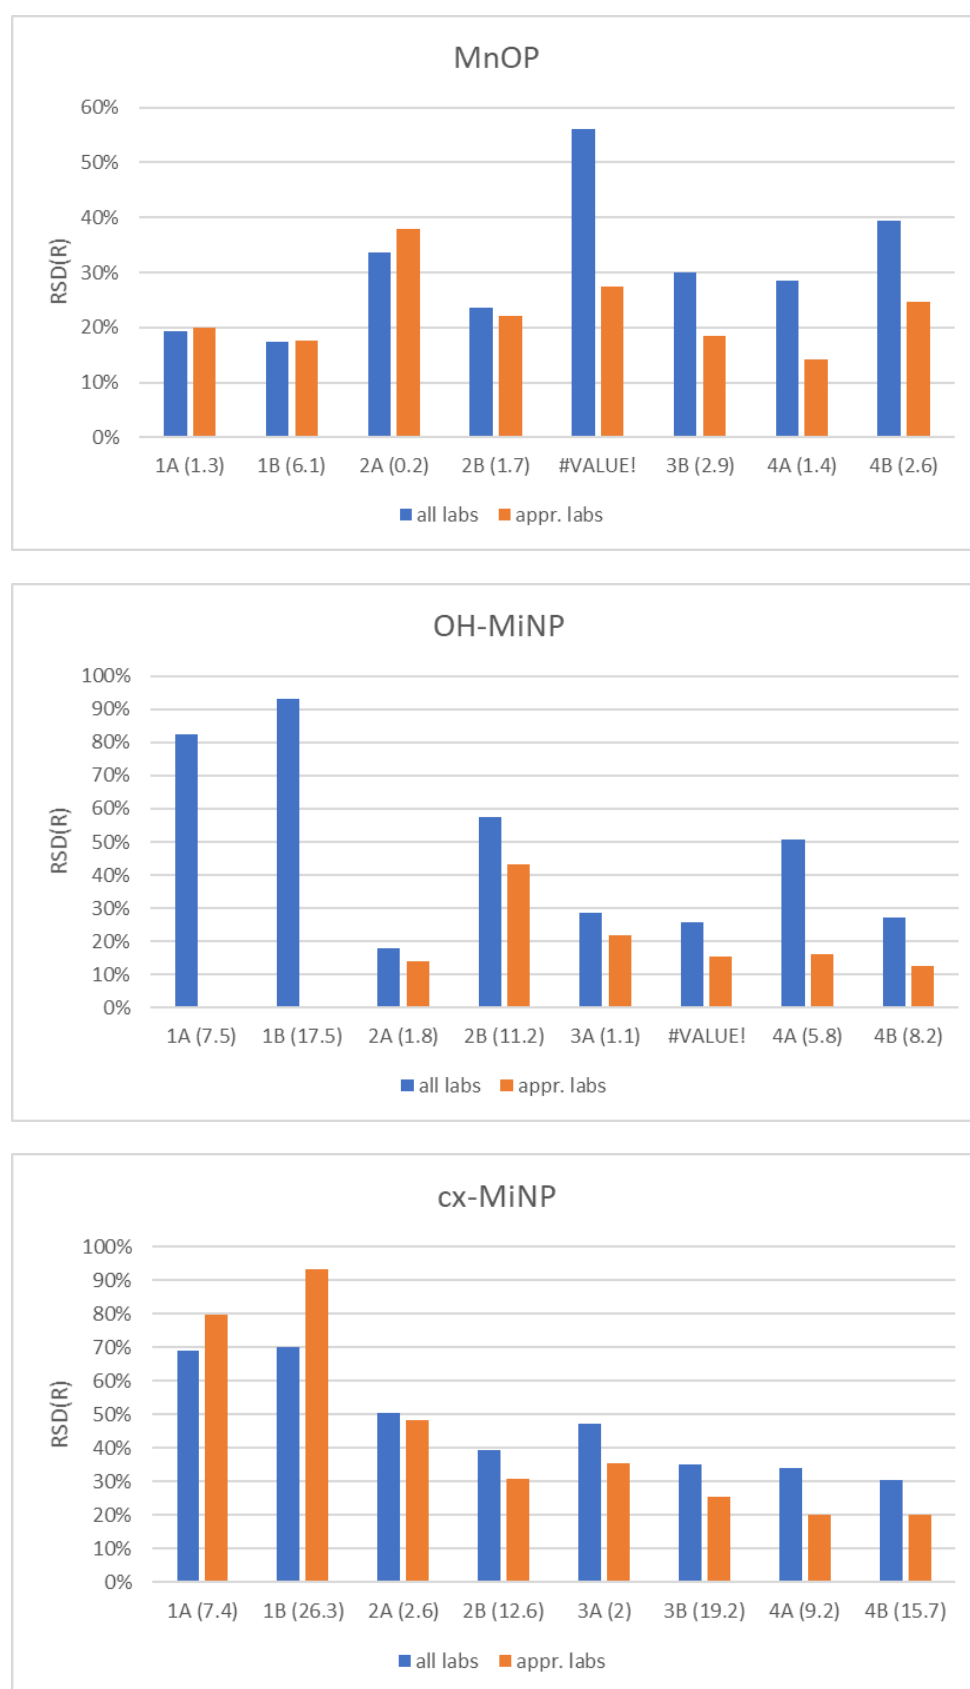

**Figure S2.** Interlaboratory variability of determination of phthalate and DINCH biomarkers in urine (continued). Appr. labs R1: RSD(R) not calculated because  $N < 7$ .

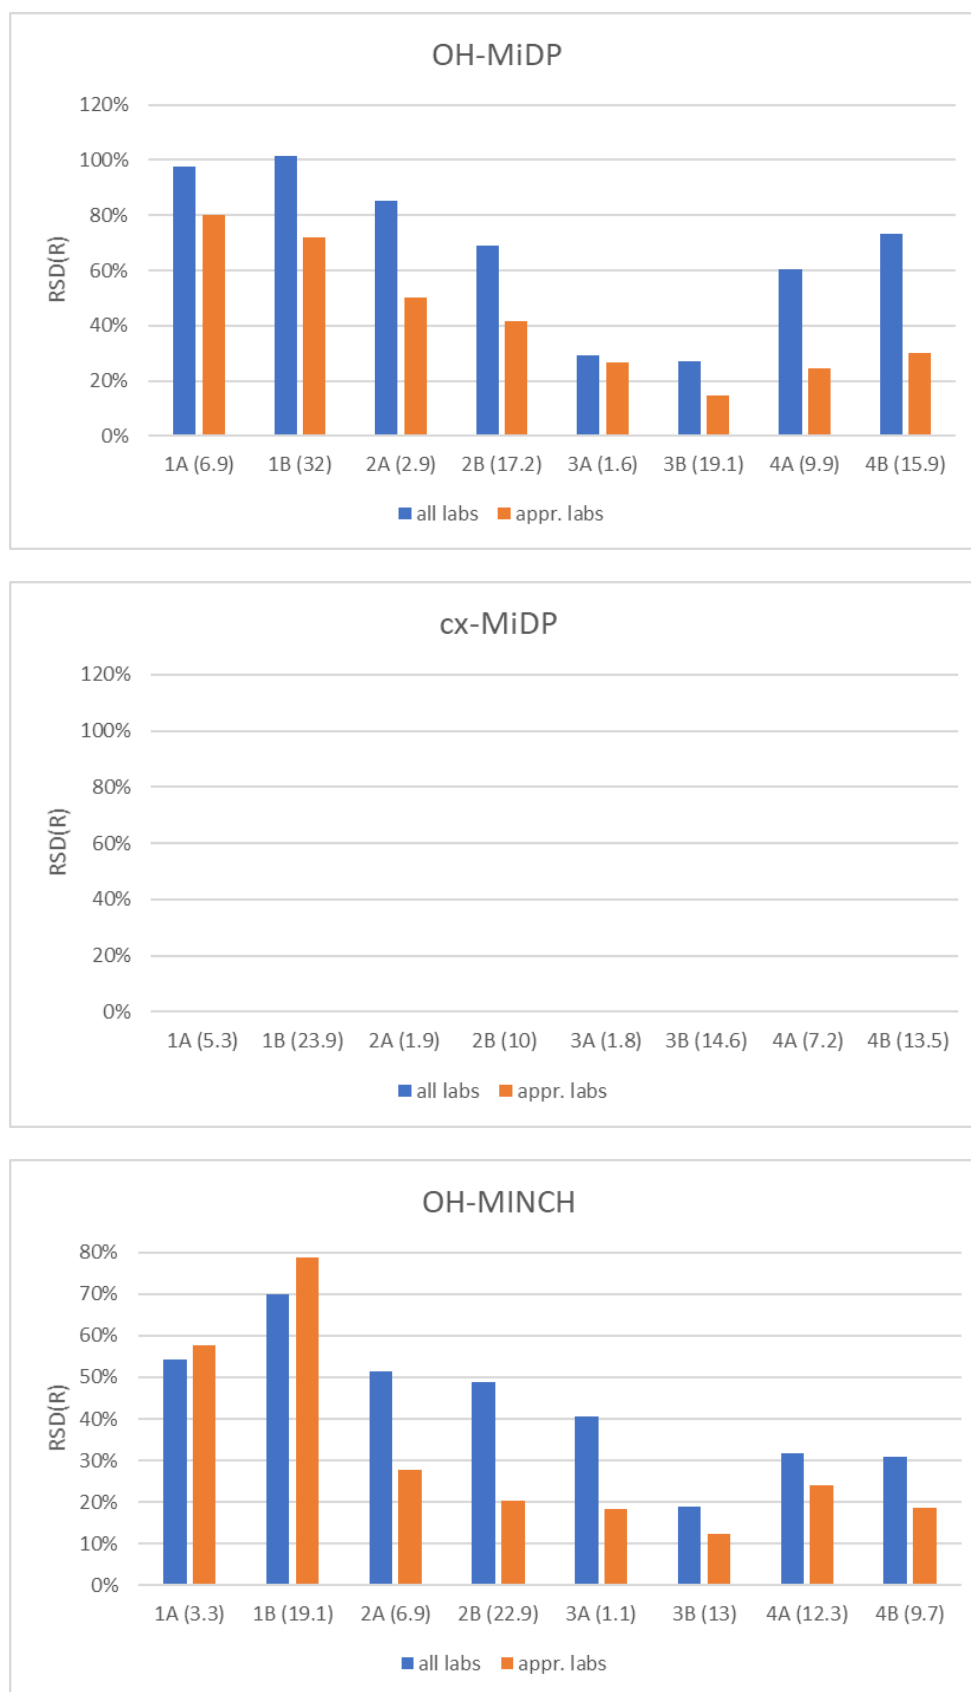

**Figure S2.** Interlaboratory variability of determination of phthalate and DINCH biomarkers in urine (continued). All labs and appr. labs: RSD(R) not calculated because  $N < 7$ .

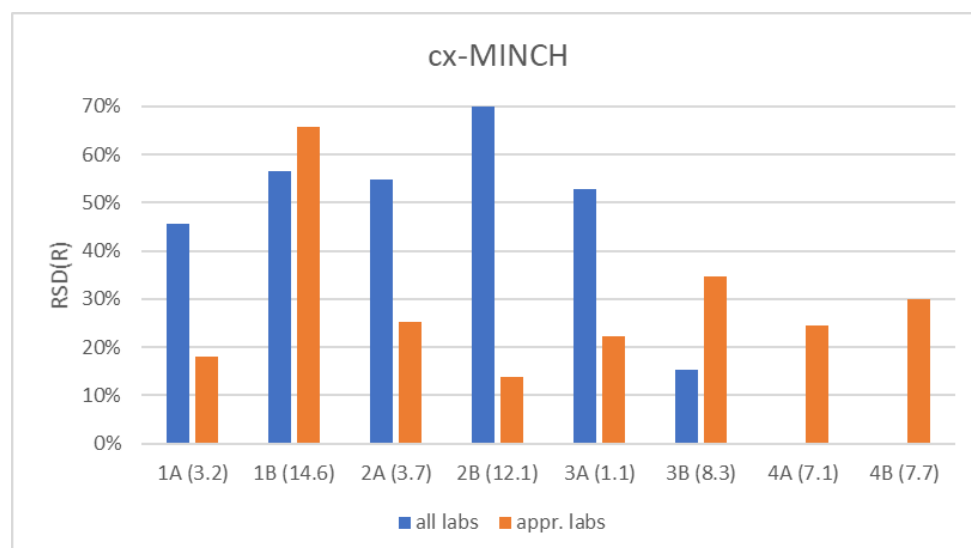

**Figure S2.** Interlaboratory variability of determination of phthalate and DINCH biomarkers in urine (continued). All labs: RSD(R) not calculated because  $N < 7$ . RSD(R) = relative standard deviation, interlaboratory reproducibility. Legend X-axis: round/material number, between brackets the concentration of the biomarker in ng/mL. All labs = laboratories participating in the PT excluding the expert laboratories. Appr. labs = EU laboratories (participants and EU-based expert laboratories) approved for sample analysis within the frame of HBM4EU.

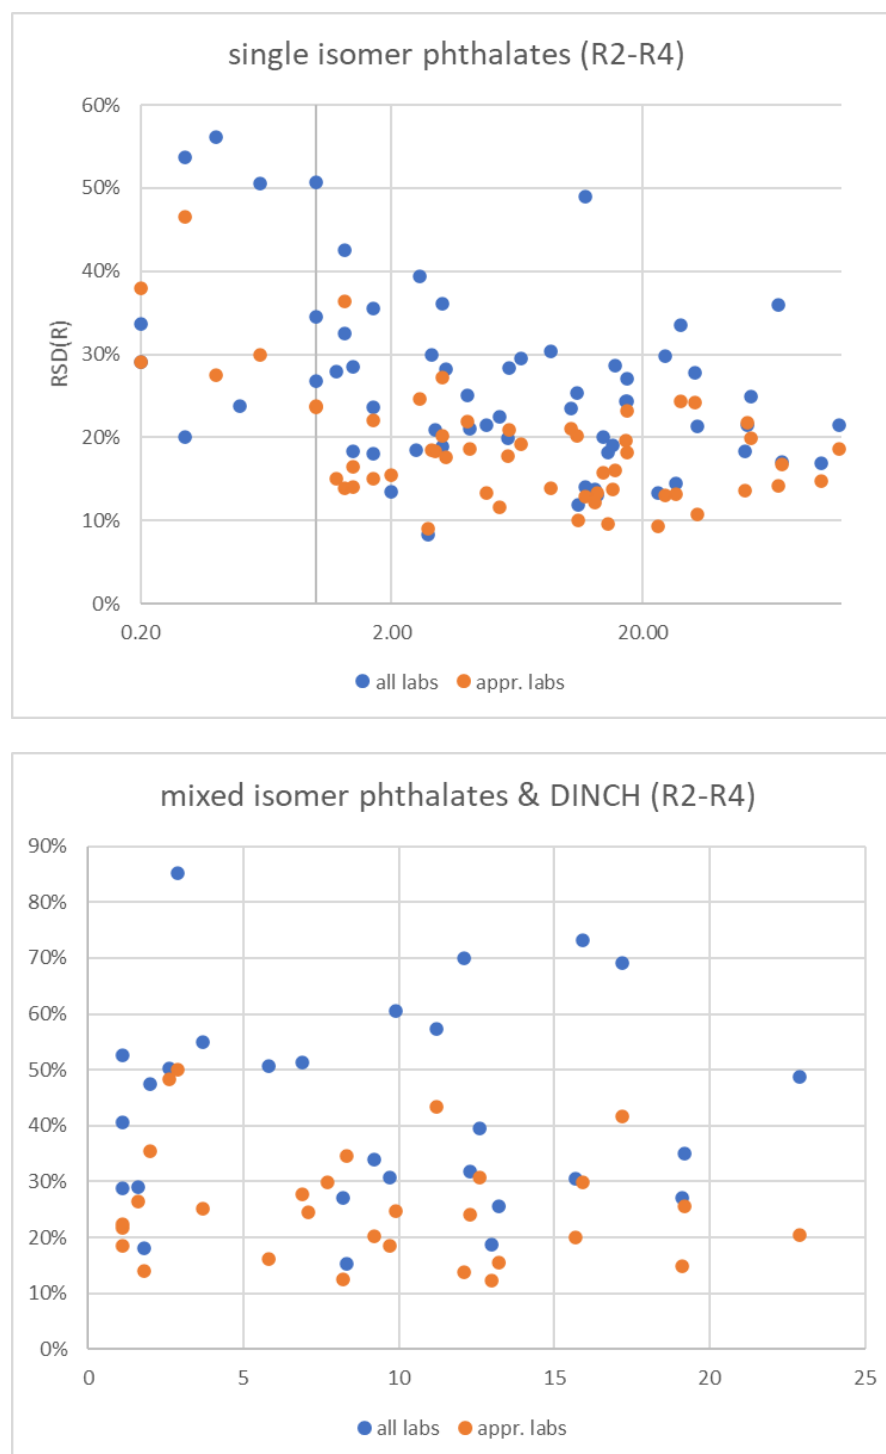

**Figure S3.**  $RSD_R$  (interlaboratory reproducibility) from rounds 2–4 versus concentration range of the biomarkers in urine. Top: average of 11 short-chain phthalate biomarkers. Note that the X-axis scale is logarithmic. Bottom: average of four long-chain phthalates and two DINCH biomarkers. Results shown for two groups of laboratories: all participants and laboratories approved in the frame of the HBM4EU project.
